# Supplementary material for: Steroidal Carboxylic Acids from Soft Coral Paraminabea acronocephala
Source: MDPI journal article supplement (doi:10.3390/md11010136), 2013-01-11
Supplement: s3 [file s3]

marinedrugs-11-00136-s002.mol
  corina  07071423133D 1   1.00000     0.00000 
CORINA 3.49 0023  12.04.2013
 34 37  0  0  0  0  0  0  0  0999 V2000
   -0.0179    1.4685    0.0101 C   0  0  0  0  0  0  0  0  0  0  0  0
    0.0021   -0.0041    0.0020 C   0  0  0  0  0  0  0  0  0  0  0  0
    1.3026   -0.6883   -0.0643 C   0  0  0  0  0  0  0  0  0  0  0  0
    2.4311    0.0080   -0.0757 C   0  0  0  0  0  0  0  0  0  0  0  0
    2.4683    1.5058   -0.0039 C   0  0  0  0  0  0  0  0  0  0  0  0
    1.1211    2.1429    0.0029 C   0  0  0  0  0  0  0  0  0  0  0  0
    3.7501   -0.7347   -0.1788 C   0  0  0  0  0  0  0  0  0  0  0  0
    4.5535   -0.1231   -1.3309 C   0  0  0  0  0  0  0  0  0  0  0  0
    4.7031    1.3836   -1.1100 C   0  0  0  0  0  0  0  0  0  0  0  0
    3.3186    2.0495   -1.1563 C   0  0  0  0  0  0  0  0  0  0  0  0
    5.5384    1.9875   -2.2242 C   0  0  0  0  0  0  0  0  0  0  0  0
    5.7198    3.4939   -1.8949 C   0  0  0  0  0  0  0  0  0  0  0  0
    4.3706    4.1591   -2.0881 C   0  0  0  0  0  0  0  0  0  0  0  0
    3.4185    3.5672   -1.0368 C   0  0  0  0  0  0  0  0  0  0  0  0
    6.9928    1.5096   -2.3003 C   0  0  0  0  0  0  0  0  0  0  0  0
    7.6986    2.6627   -3.0646 C   0  0  0  0  0  0  0  0  0  0  0  0
    6.8340    3.9285   -2.8412 C   0  0  0  0  0  0  0  0  0  0  0  0
   10.0453    5.2765   -2.7207 C   0  0  0  0  0  0  0  0  0  0  0  0
    8.8051    5.4067   -3.1220 C   0  0  0  0  0  0  0  0  0  0  0  0
    7.6720    5.0365   -2.2000 C   0  0  0  0  0  0  0  0  0  0  0  0
   12.0581    4.4191   -3.8880 C   0  0  0  0  0  0  0  0  0  0  0  0
   11.1785    5.6467   -3.6426 C   0  0  0  0  0  0  0  0  0  0  0  0
    6.1747    3.6563   -0.4432 C   0  0  0  0  0  0  0  0  0  0  0  0
    5.1682    1.5689   -0.1418 H   0  0  0  0  0  0  0  0  0  0  0  0
    3.1763    1.8940    1.2956 C   0  0  0  0  0  0  0  0  0  0  0  0
    6.4142    4.2709   -3.7871 H   0  0  0  0  0  0  0  0  0  0  0  0
    6.7924    6.2640   -1.9546 C   0  0  0  0  0  0  0  0  0  0  0  0
    5.0359    1.8649   -3.1837 H   0  0  0  0  0  0  0  0  0  0  0  0
    2.8358    1.8082   -2.1033 H   0  0  0  0  0  0  0  0  0  0  0  0
   -1.0340   -0.6405    0.0495 O   0  0  0  0  0  0  0  0  0  0  0  0
   12.0164    6.7546   -3.0014 C   0  0  0  0  0  0  0  0  0  0  0  0
   13.1184    4.7561   -4.9046 C   0  0  0  0  0  0  0  0  0  0  0  0
   13.1656    5.8643   -5.3836 O   0  0  0  0  0  0  0  0  0  0  0  0
   14.0103    3.8250   -5.2779 O   0  0  0  0  0  0  0  0  0  0  0  0
  1  2  1  0      
  2  3  1  0      
  3  4  2  0      
  4  5  1  0      
  5  6  1  0      
  6  1  2  0      
  4  7  1  0      
  7  8  1  0      
  8  9  1  0      
  9 10  1  0      
 10  5  1  0      
  9 11  1  0      
 11 12  1  0      
 12 13  1  0      
 13 14  1  0      
 14 10  1  0      
 11 15  1  0      
 15 16  1  0      
 16 17  1  0      
 17 12  1  0      
 18 19  2  0      
 19 20  1  0      
 20 17  1  0      
 21 22  1  0      
 22 18  1  0      
 12 23  1  0      
  9 24  1  0      
  5 25  1  0      
 17 26  1  0      
 20 27  1  0      
 11 28  1  0      
 10 29  1  0      
  2 30  2  0      
 22 31  1  0      
 21 32  1  0      
 32 33  2  0      
 32 34  1  0      
M  STY  1   1 SUP
M  SLB  1   1   1
M  SAL   1  3  32  33  34
M  SBL   1  1  35
M  SMT   1 COOH
M  SBV   1 35   -7.6343    3.9352
M  END
$$$$
