# Supplementary material for: Steroidal Carboxylic Acids from Soft Coral Paraminabea acronocephala
Source: MDPI journal article supplement (doi:10.3390/md11010136), 2013-01-11
Supplement: s5 [file s5]

marinedrugs-11-00136-s003.mol
  corina  07071423133D 1   1.00000     0.00000 
CORINA 3.49 0023  12.04.2013
 35 38  0  0  0  0  0  0  0  0999 V2000
    0.4999    0.3111    0.0078 C   0  0  0  0  0  0  0  0  0  0  0  0
    0.7098   -1.1361   -0.1657 C   0  0  0  0  0  0  0  0  0  0  0  0
    2.0835   -1.6292   -0.3500 C   0  0  0  0  0  0  0  0  0  0  0  0
    3.1106   -0.7910   -0.3196 C   0  0  0  0  0  0  0  0  0  0  0  0
    2.9569    0.6820   -0.0819 C   0  0  0  0  0  0  0  0  0  0  0  0
    1.5404    1.1288    0.0395 C   0  0  0  0  0  0  0  0  0  0  0  0
    4.5083   -1.3353   -0.5477 C   0  0  0  0  0  0  0  0  0  0  0  0
    5.1712   -0.5023   -1.6492 C   0  0  0  0  0  0  0  0  0  0  0  0
    5.1347    0.9786   -1.2660 C   0  0  0  0  0  0  0  0  0  0  0  0
    3.6750    1.4544   -1.1929 C   0  0  0  0  0  0  0  0  0  0  0  0
    5.8319    1.8043   -2.3318 C   0  0  0  0  0  0  0  0  0  0  0  0
    5.8319    3.2775   -1.8420 C   0  0  0  0  0  0  0  0  0  0  0  0
    4.4004    3.7731   -1.9159 C   0  0  0  0  0  0  0  0  0  0  0  0
    3.5831    2.9504   -0.9075 C   0  0  0  0  0  0  0  0  0  0  0  0
    7.3307    1.5361   -2.5077 C   0  0  0  0  0  0  0  0  0  0  0  0
    7.8449    2.8482   -3.1604 C   0  0  0  0  0  0  0  0  0  0  0  0
    6.8352    3.9558   -2.7690 C   0  0  0  0  0  0  0  0  0  0  0  0
    9.8916    5.6084   -2.5025 C   0  0  0  0  0  0  0  0  0  0  0  0
    8.6473    5.6426   -2.9106 C   0  0  0  0  0  0  0  0  0  0  0  0
    7.5517    5.0911   -2.0351 C   0  0  0  0  0  0  0  0  0  0  0  0
   11.7833    7.2088   -2.5989 C   0  0  0  0  0  0  0  0  0  0  0  0
   10.9872    6.1599   -3.3780 C   0  0  0  0  0  0  0  0  0  0  0  0
    5.6165    1.1200   -0.2986 H   0  0  0  0  0  0  0  0  0  0  0  0
    3.6686    1.0205    1.2295 C   0  0  0  0  0  0  0  0  0  0  0  0
    6.3309    4.3379   -3.6566 H   0  0  0  0  0  0  0  0  0  0  0  0
    6.5500    6.2013   -1.7113 C   0  0  0  0  0  0  0  0  0  0  0  0
    5.3053    1.7186   -3.2824 H   0  0  0  0  0  0  0  0  0  0  0  0
    3.1838    1.2532   -2.1450 H   0  0  0  0  0  0  0  0  0  0  0  0
   -0.2318   -1.9069   -0.1565 O   0  0  0  0  0  0  0  0  0  0  0  0
   10.9121    8.2694   -2.2011 O   0  0  0  0  0  0  0  0  0  0  0  0
   12.3999    6.5622   -1.3569 C   0  0  0  0  0  0  0  0  0  0  0  0
   12.8956    7.7688   -3.4878 C   0  0  0  0  0  0  0  0  0  0  0  0
    6.3218    3.3425   -0.4183 C   0  0  0  0  0  0  0  0  0  0  0  0
    7.4797    2.7542   -0.0794 O   0  0  0  0  0  0  0  0  0  0  0  0
    5.6722    3.9242    0.4181 O   0  0  0  0  0  0  0  0  0  0  0  0
  1  2  1  0      
  2  3  1  0      
  3  4  2  0      
  4  5  1  0      
  5  6  1  0      
  6  1  2  0      
  4  7  1  0      
  7  8  1  0      
  8  9  1  0      
  9 10  1  0      
 10  5  1  0      
  9 11  1  0      
 11 12  1  0      
 12 13  1  0      
 13 14  1  0      
 14 10  1  0      
 11 15  1  0      
 15 16  1  0      
 16 17  1  0      
 17 12  1  0      
 18 19  2  0      
 19 20  1  0      
 20 17  1  0      
 21 22  1  0      
 22 18  1  0      
  9 23  1  0      
  5 24  1  0      
 17 25  1  0      
 20 26  1  0      
 11 27  1  0      
 10 28  1  0      
  2 29  2  0      
 21 30  1  0      
 21 31  1  0      
 21 32  1  0      
 12 33  1  0      
 33 34  1  0      
 33 35  2  0      
M  END
$$$$
