# Supplementary material for: Steroidal Carboxylic Acids from Soft Coral Paraminabea acronocephala
Source: MDPI journal article supplement (doi:10.3390/md11010136), 2013-01-11
Supplement: s6 [file s6]

marinedrugs-11-00136-s003.mol
  ChemDraw06021422322D

 35 38  0  0  0  0  0  0  0  0999 V2000
   -3.7069   -0.7960    0.0000 C   0  0  0  0  0  0  0  0  0  0  0  0
   -3.7069   -1.6210    0.0000 C   0  0  0  0  0  0  0  0  0  0  0  0
   -2.9925   -2.0335    0.0000 C   0  0  0  0  0  0  0  0  0  0  0  0
   -2.2780   -1.6210    0.0000 C   0  0  0  0  0  0  0  0  0  0  0  0
   -2.2780   -0.7960    0.0000 C   0  0  0  0  0  0  0  0  0  0  0  0
   -2.9925   -0.3835    0.0000 C   0  0  0  0  0  0  0  0  0  0  0  0
   -1.5635   -2.0335    0.0000 C   0  0  0  0  0  0  0  0  0  0  0  0
   -0.8491   -1.6210    0.0000 C   0  0  0  0  0  0  0  0  0  0  0  0
   -0.8491   -0.7960    0.0000 C   0  0  0  0  0  0  0  0  0  0  0  0
   -1.5635   -0.3835    0.0000 C   0  0  0  0  0  0  0  0  0  0  0  0
   -0.1346   -0.3835    0.0000 C   0  0  0  0  0  0  0  0  0  0  0  0
   -0.1346    0.4415    0.0000 C   0  0  0  0  0  0  0  0  0  0  0  0
   -0.8491    0.8540    0.0000 C   0  0  0  0  0  0  0  0  0  0  0  0
   -1.5635    0.4415    0.0000 C   0  0  0  0  0  0  0  0  0  0  0  0
    0.6500   -0.6384    0.0000 C   0  0  0  0  0  0  0  0  0  0  0  0
    1.1350    0.0290    0.0000 C   0  0  0  0  0  0  0  0  0  0  0  0
    0.6500    0.6965    0.0000 C   0  0  0  0  0  0  0  0  0  0  0  0
    2.2910    0.8689    0.0000 C   0  0  0  0  0  0  0  0  0  0  0  0
    1.8061    1.5364    0.0000 C   0  0  0  0  0  0  0  0  0  0  0  0
    0.9856    1.4501    0.0000 C   0  0  0  0  0  0  0  0  0  0  0  0
    3.5964    0.2877    0.0000 C   0  0  0  0  0  0  0  0  0  0  0  0
    3.1115    0.9552    0.0000 C   0  0  0  0  0  0  0  0  0  0  0  0
   -0.8491    0.0290    0.0000 H   0  0  0  0  0  0  0  0  0  0  0  0
   -2.2780    0.0290    0.0000 C   0  0  0  0  0  0  0  0  0  0  0  0
    1.4469    0.9100    0.0000 H   0  0  0  0  0  0  0  0  0  0  0  0
    0.4022    2.0335    0.0000 C   0  0  0  0  0  0  0  0  0  0  0  0
   -0.1346   -1.2085    0.0000 H   0  0  0  0  0  0  0  0  0  0  0  0
   -1.5635   -1.2085    0.0000 H   0  0  0  0  0  0  0  0  0  0  0  0
   -4.4214   -2.0335    0.0000 O   0  0  0  0  0  0  0  0  0  0  0  0
    4.0089   -0.4268    0.0000 O   0  0  0  0  0  0  0  0  0  0  0  0
    3.1839   -0.4268    0.0000 C   0  0  0  0  0  0  0  0  0  0  0  0
    4.4214    0.2877    0.0000 C   0  0  0  0  0  0  0  0  0  0  0  0
   -0.5471    1.1560    0.0000 C   0  0  0  0  0  0  0  0  0  0  0  0
   -1.3721    1.1560    0.0000 O   0  0  0  0  0  0  0  0  0  0  0  0
    0.0363    1.7393    0.0000 O   0  0  0  0  0  0  0  0  0  0  0  0
  1  2  1  0      
  2  3  1  0      
  3  4  2  0      
  4  5  1  0      
  5  6  1  0      
  6  1  2  0      
  4  7  1  0      
  7  8  1  0      
  8  9  1  0      
  9 10  1  0      
 10  5  1  0      
  9 11  1  0      
 11 12  1  0      
 12 13  1  0      
 13 14  1  0      
 14 10  1  0      
 11 15  1  0      
 15 16  1  0      
 16 17  1  0      
 17 12  1  0      
 18 19  2  0      
 19 20  1  0      
 20 17  1  0      
 21 22  1  0      
 22 18  1  0      
  9 23  1  1      
  5 24  1  1      
 17 25  1  6      
 20 26  1  6      
 11 27  1  6      
 10 28  1  6      
  2 29  2  0      
 21 30  1  0      
 21 31  1  0      
 21 32  1  0      
 12 33  1  1      
 33 34  1  0      
 33 35  2  0      
M  END
